# Supplementary material for: Positive association between plasmatic levels of orexin A and the endocannabinoid-derived 2-arachidonoyl lysophosphatidic acid in Alzheimer’s disease
Source: PubMed Central journal article supplement (PMC9710385; doi:10.3389/fnagi.2022.1004002), 2022-11-16
Supplement: Data_Sheet_1.pdf [file Data_Sheet_1.pdf]

Supplementary Table.1

|                        | HC            | AD           |          |        |
|------------------------|---------------|--------------|----------|--------|
| <b>Age</b>             | 69,35 ± 26,41 | 76,70 ± 8,12 | 69.94    | <0.001 |
| <b>Schooling</b>       | 11,20 ± 4,53  | 9,47 ± 4,81  | 27.53    | <0.001 |
| <b>MMSE</b>            | 29,46 ± 1,27  | 23,40 ± 2,12 | 469,68   | <0.001 |
| <b>BMI</b>             | 23,9 ± 1,59   | 23,40 ± 2,12 | 21,806   | <0.001 |
|                        |               |              | $\chi^2$ | P      |
| <b>Sex</b>             |               |              |          |        |
| Male                   | 20 (100%)     | 20(100%)     |          |        |
|                        |               |              | 0.200    | 0.000  |
| Female                 | 0 (0%)        | 0(0%)        |          |        |
|                        |               |              |          |        |
| <b>Patient history</b> |               |              |          |        |
| Smoke                  | 1 (10%)       | 6(30%)       | 39,200   | 0,361  |
| Dyslipidemia           | 2(20%)        | 2(10%)       | 36,450   | 0,303  |
| Diabetes               | 2(20%)        | 2 (10%)      | 39,200   | 0,516  |
| Hypertension           | 4 (40%)       | 10(50%)      | 1,300    | 0,399  |
| AMI                    | 2(20%)        | 0(0%)        | 51,200   | 0,138  |
| Cerebrovascular events | 0(0%)         | 0 (0%)       | 76,050   | 0,393  |
|                        |               |              |          |        |
| <b>Drugs</b>           |               |              |          |        |
| Antihypertensive agent | 7(70%)        | 14(70%)      | 2,450    | 0,240  |
| Lipid lowering         | 1(10%)        | 2(10%)       | 16,200   | 0,971  |
|                        |               |              |          |        |
| <b>Medicinal</b>       |               |              |          |        |
| <b>Products</b>        |               |              |          |        |
| Thyroid hormones       | 1(10%)        | 2(10%)       | 34,667   | 0,06   |
| AchE-I                 | 0(0%)         | 4(20%)       | 63,450   | 0,292  |
| Benzodiazepines        | 1(10%)        | 2(10%)       | 54,450   | 0,245  |

**Supplementary Table 1. Demographic and clinical characteristics of the study group.**

HC, healthy controls, AD, Alzheimer's disease. MMSE, Mini Mental State Examination.

# Supplementary Fig.1

**A**

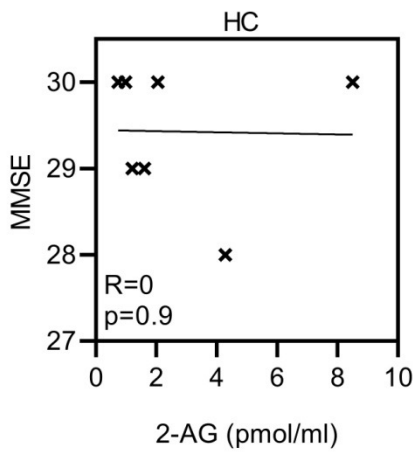

**B**

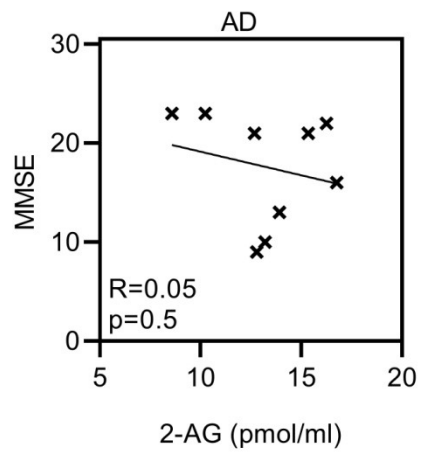

**Supplementary Fig. 1.** (A) Pearson's correlation between the 2-AG plasma levels and MMSE score in HC subjects,  $R=0$ ;  $p$  (two tailed) = 0.15; (B) Pearson's correlation between the 2-AG plasma levels and MMSE score in AD subjects,  $R=0.05$ ;  $p$  (two tailed) = 0.5.

# Supplementary Fig.2

pT231Tau/DAPI

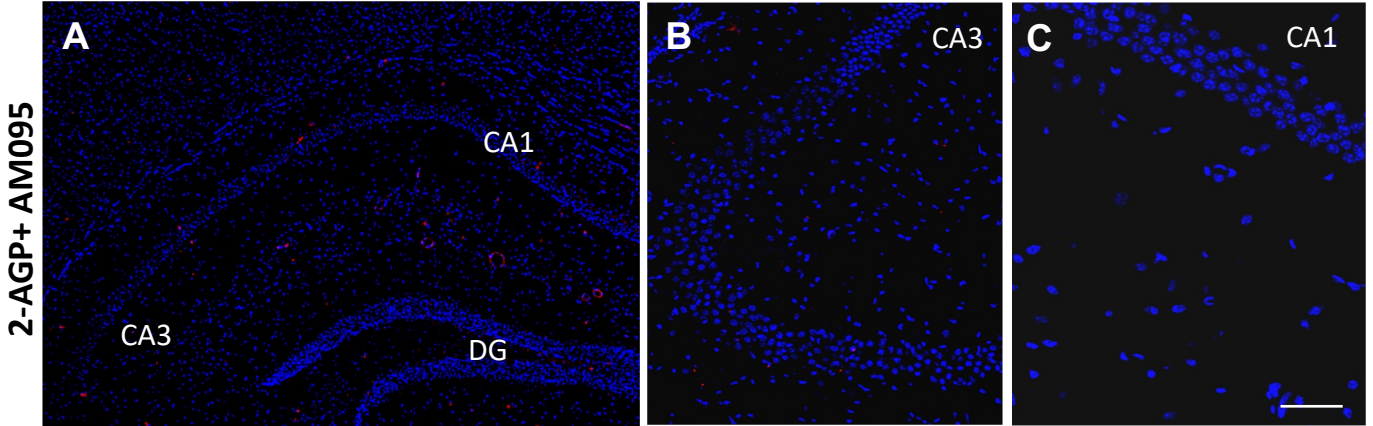

**Supplementary Fig 2.** Immunoreactivity of p-T231-tau in the hippocampus of mouse injected with the LPA1R antagonist AM095 before 2-AGP administration. Note the lowest pT231-tau expression.
